# Supplementary material for: Comparative analysis of Faecalibacterium prausnitzii genomes shows a high level of genome plasticity and warrants separation into new species-level taxa
Source: PubMed Central journal article supplement (PMC6295017; doi:10.1186/s12864-018-5313-6), 2018-12-14

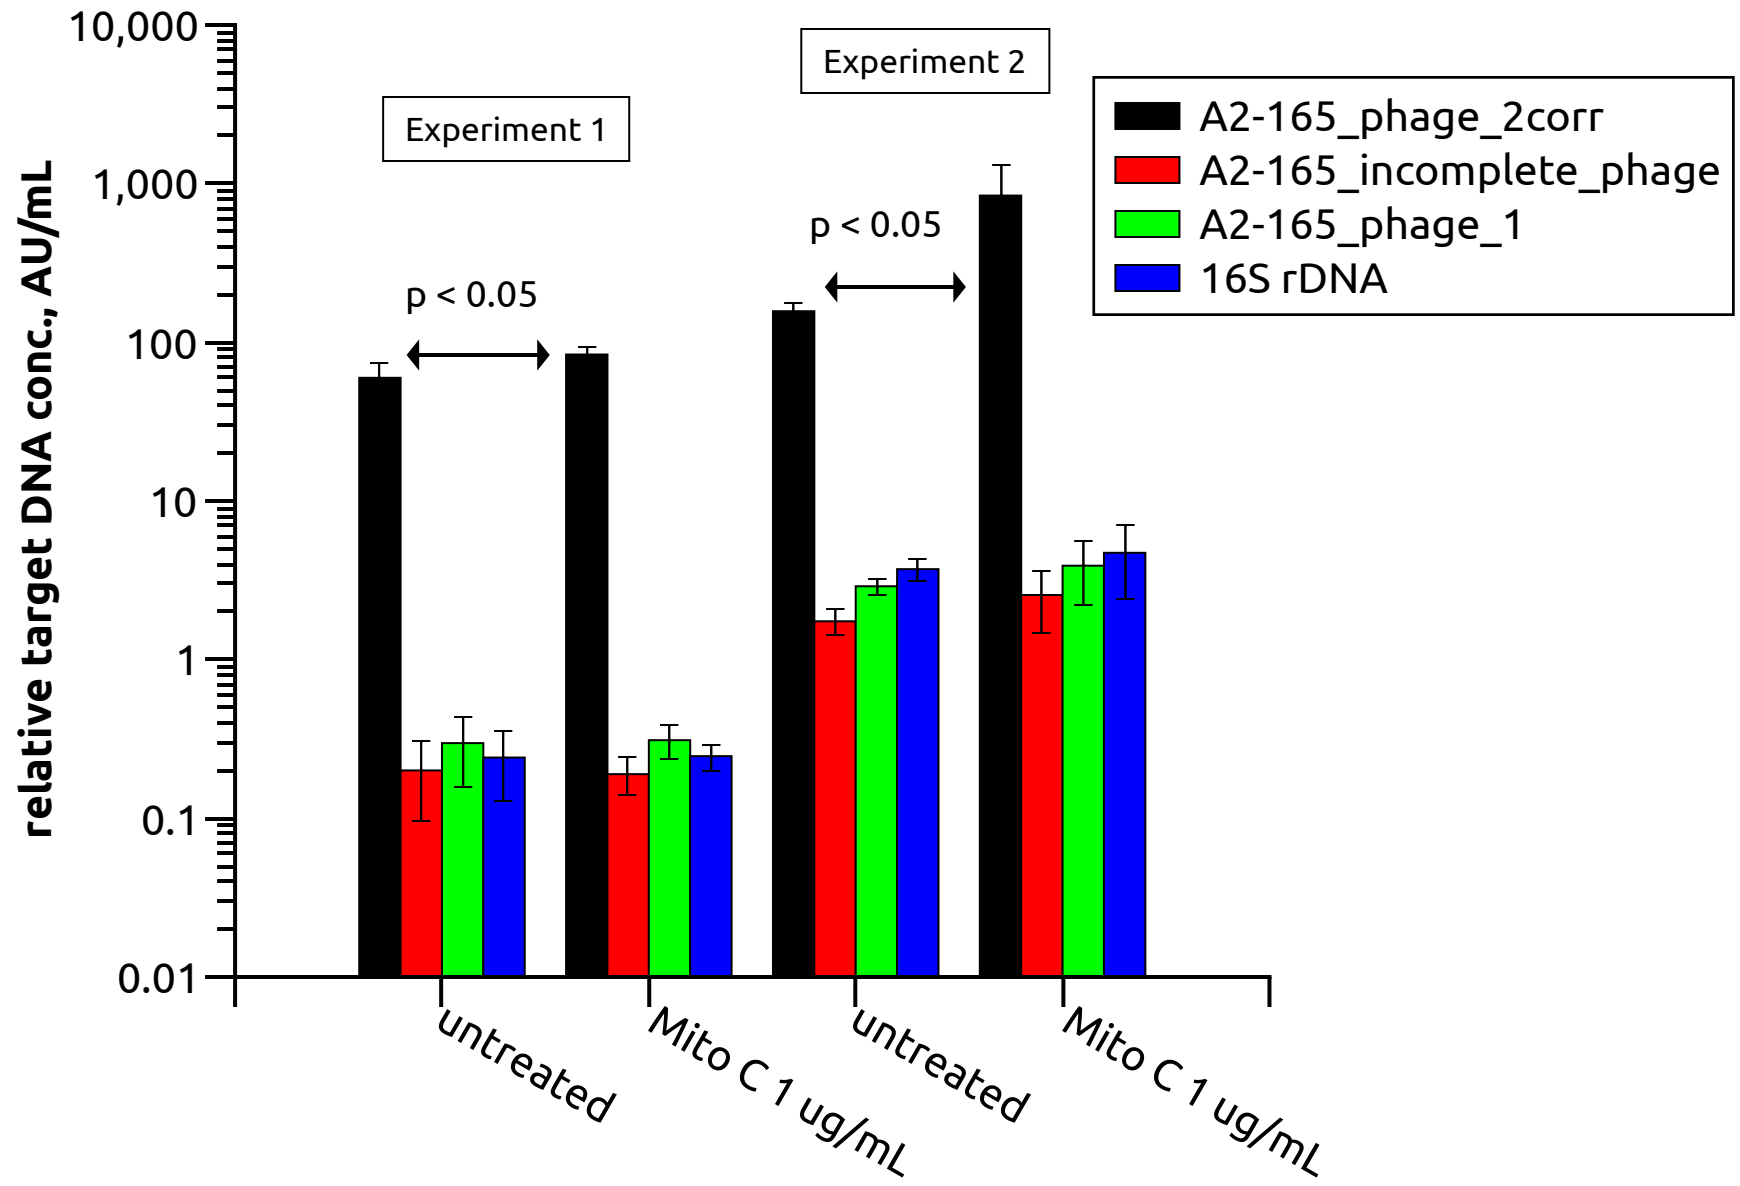

Supplement: 12864_2018_5313_MOESM12_ESM.pdf [file 12864_2018_5313_MOESM12_ESM.pdf]
